# Supplementary material
Source: MDPI journal article supplement (https://www.mdpi.com/2073-4344/13/7/1092)
Supplement: s1 [file s1]

# Understanding the role of electrolyte cations on activity and product selectivity of CO<sub>2</sub> reduction over Cu electrode

Aamir Hassan Shah <sup>1,2</sup>, Yue Gong <sup>1,2</sup>, Yanjie Wang <sup>1,\*</sup>, Abebe Reda Woldu <sup>1,2</sup> and Tao He <sup>1,2,\*</sup>

<sup>1</sup> CAS Key Laboratory of Nanosystem and Hierarchical Fabrication, National Center for Nanoscience and Technology, Beijing 100190, China

<sup>2</sup> University of Chinese Academy of Sciences, Beijing 100049, China

\* Correspondence: E-mail: wangyanjie@nanoctr.cn (Y. Wang), het@nanoctr.cn (T. He)

**Figure S1.** SEM images of the Cu electrode (a) before and (b) after electropolishing.

**Figure S2.** Setup for electrochemical measurements.

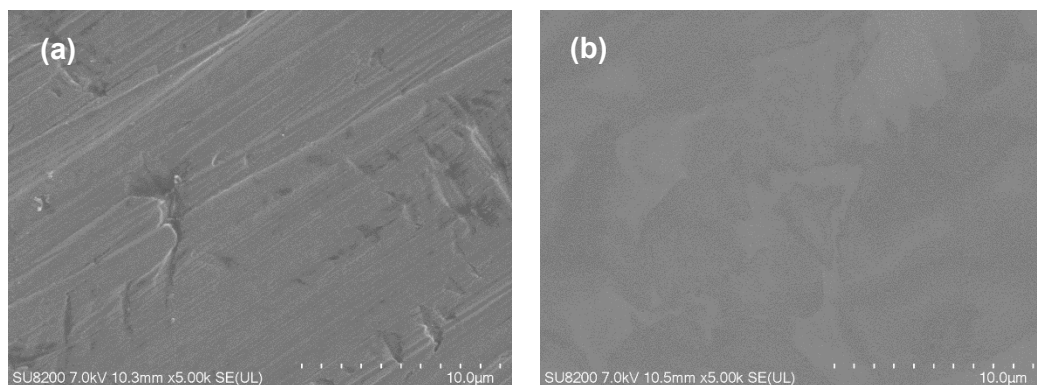

**Figure S1.** SEM images of the Cu electrode (a) before and (b) after electropolishing.

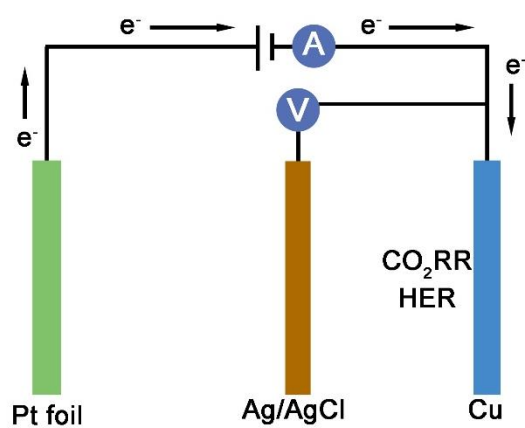

**Figure S2.** Setup for electrochemical measurements.
